# Supplementary material for: Fucosylation of HLA-DRB1 regulates CD4+ T cell-mediated anti-melanoma immunity and enhances immunotherapy efficacy
Source: PubMed Central journal article supplement (PMC9970875; doi:10.1038/s43018-022-00506-7), 2023-01-23

# Extended Data Figure 1L

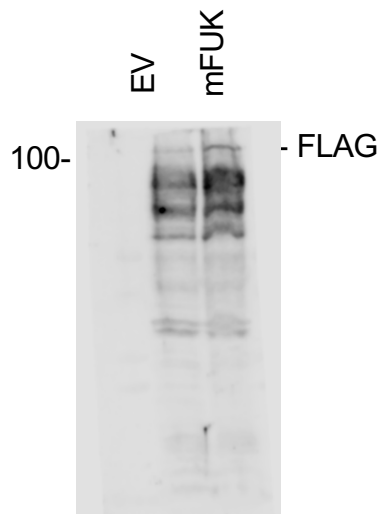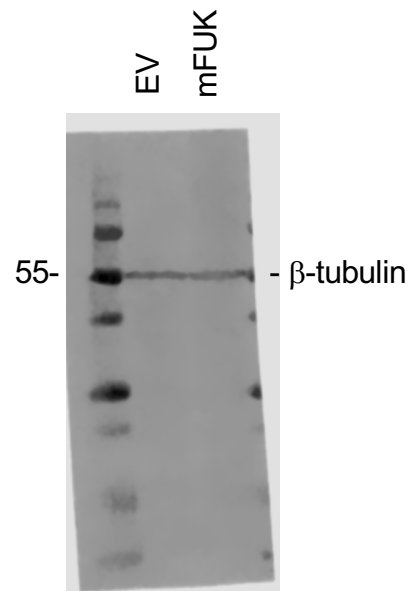

Supplement: 43018_2022_506_MOESM7_ESM.pdf [file 43018_2022_506_MOESM7_ESM.pdf]
