# Supplementary material for: Fucosylation of HLA-DRB1 regulates CD4+ T cell-mediated anti-melanoma immunity and enhances immunotherapy efficacy
Source: PubMed Central journal article supplement (PMC9970875; doi:10.1038/s43018-022-00506-7), 2023-01-23

# Extended Data Figure 2B

|           | Donor 1 |   |   |   | Donor 2 |   |   |   | Donor 3 |   |   |   |
|-----------|---------|---|---|---|---------|---|---|---|---------|---|---|---|
| L-fucose  | -       | + | - | + | -       | + | - | + | -       | + | - | + |
| Forskolin | -       | - | + | + | -       | - | + | + | -       | - | + | + |

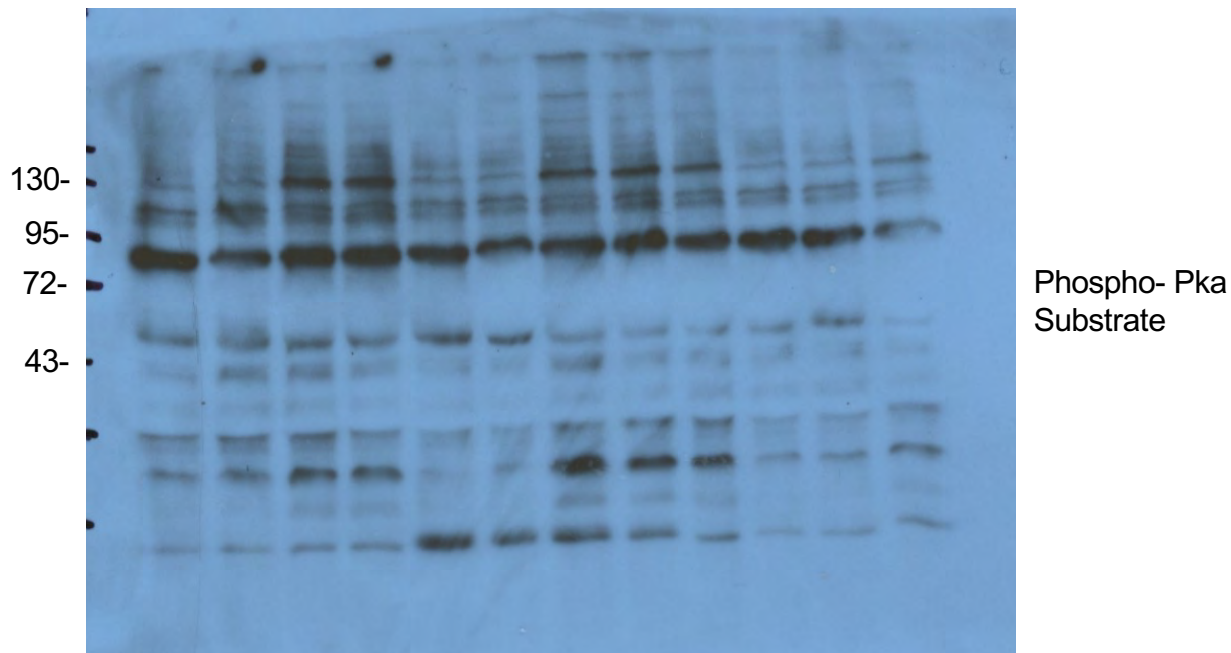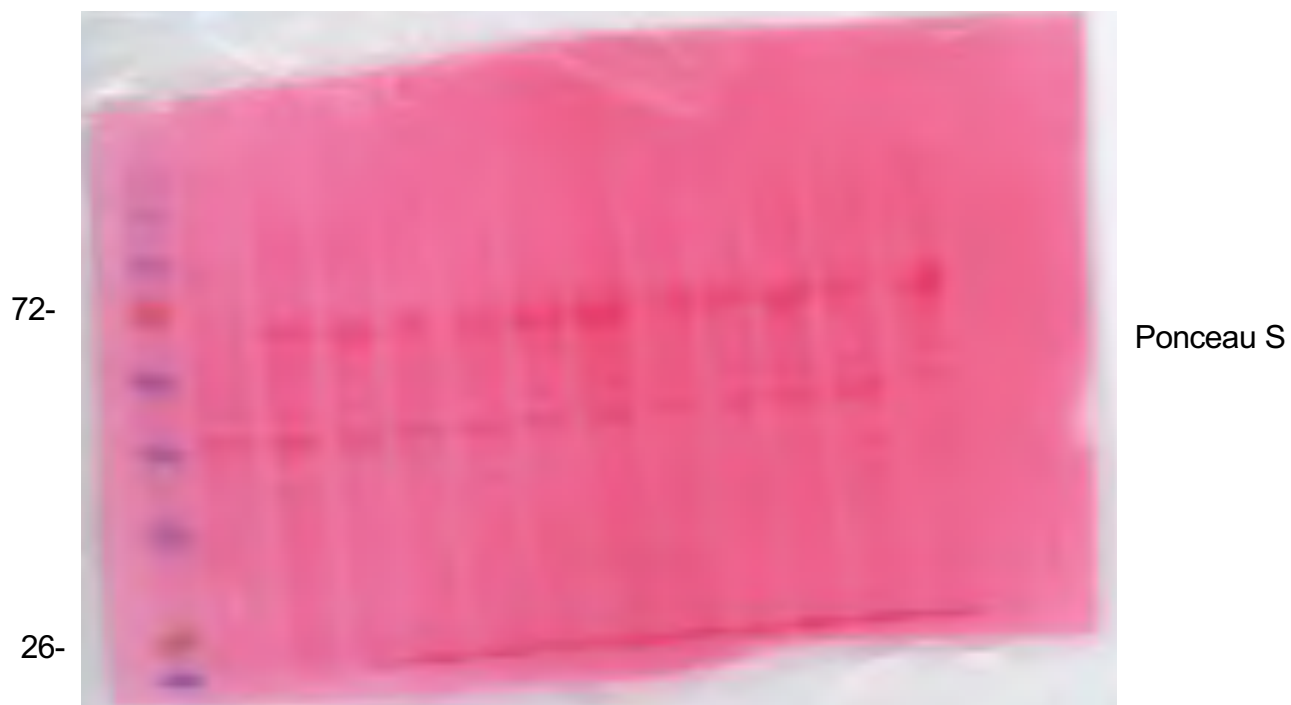

# Extended Data Figure 2C

|          | Donor 1 |   |   |   | Donor 2 |   |   |   | Donor 3 |   |   |   |
|----------|---------|---|---|---|---------|---|---|---|---------|---|---|---|
| L-fucose | -       | + | - | + | -       | + | - | + | -       | + | - | + |
| DTSSP    | -       | - | + | + | -       | - | + | + | -       | - | + | + |

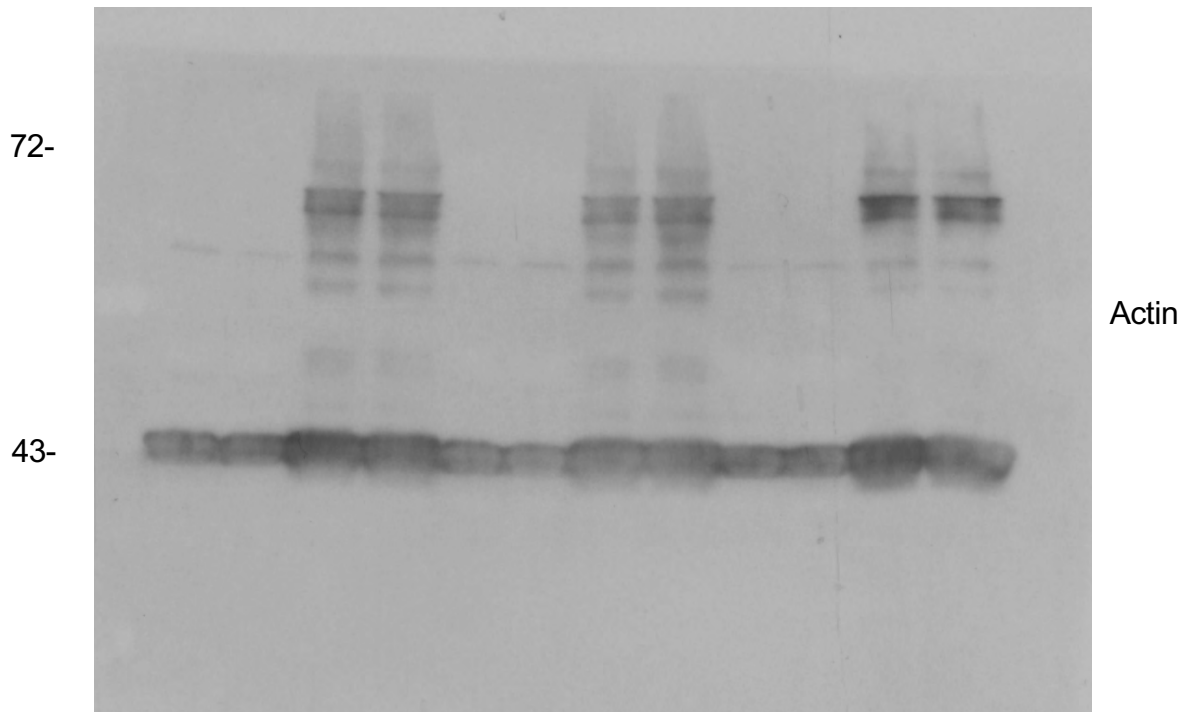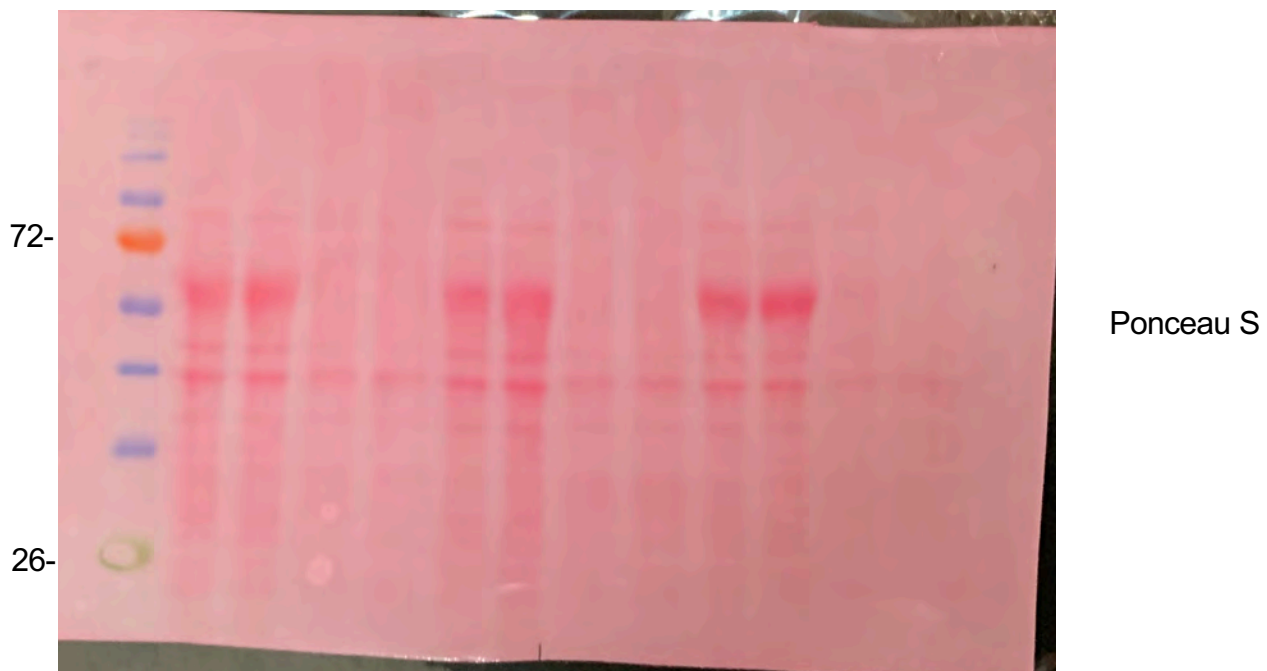

# Extended Data Figure 2F

|          | Input |   |   |   | Control |   |   |   | AAL |   |   |   |
|----------|-------|---|---|---|---------|---|---|---|-----|---|---|---|
| CD3/CD28 | -     | - | + | + | -       | - | + | + | -   | - | + | + |
| L-fucose | -     | + | - | + | -       | + | - | + | -   | + | - | + |

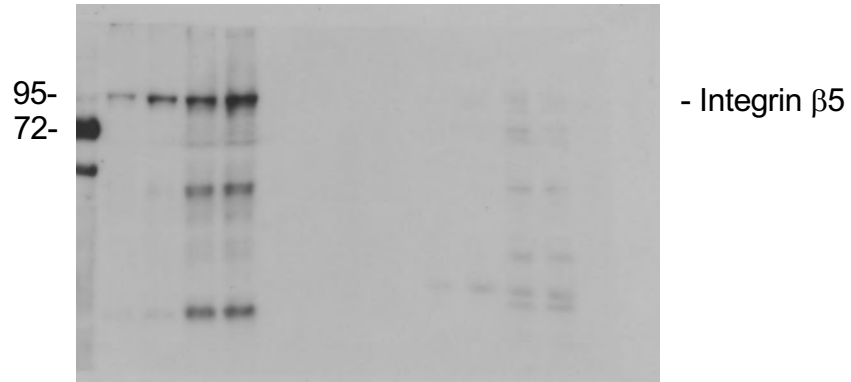

Supplement: 43018_2022_506_MOESM8_ESM.pdf [file 43018_2022_506_MOESM8_ESM.pdf]
